# Supplementary material
Source: PubMed Central journal article supplement (PMC3136785)
Supplement: mmc1.pdf [file mmc1.pdf]

# **The Fraction of Myosin Motors That Participate in Isometric Contraction of Rabbit Muscle Fibers at Near-Physiological Temperature**

Andrey K. Tsaturyan,<sup>†</sup> Sergey Y. Bershitsky,<sup>‡</sup> Natalia A. Koubassova,<sup>†</sup> Manuel Fernandez,<sup>§</sup> Theyencheri Narayanan,<sup>§</sup> and Michael A. Ferenczi<sup>¶</sup>

**The fraction of myosin motors participating in isometric contraction of rabbit muscle fibers at near-physiological temperature** Andrey Kimovich Tsaturyan, Sergey Bershitsky, Natalia Koubassova, Manuel Fernandez, Narayanan Theyencheri, and Michael Ferenczi  
Supporting Materials Figure 1

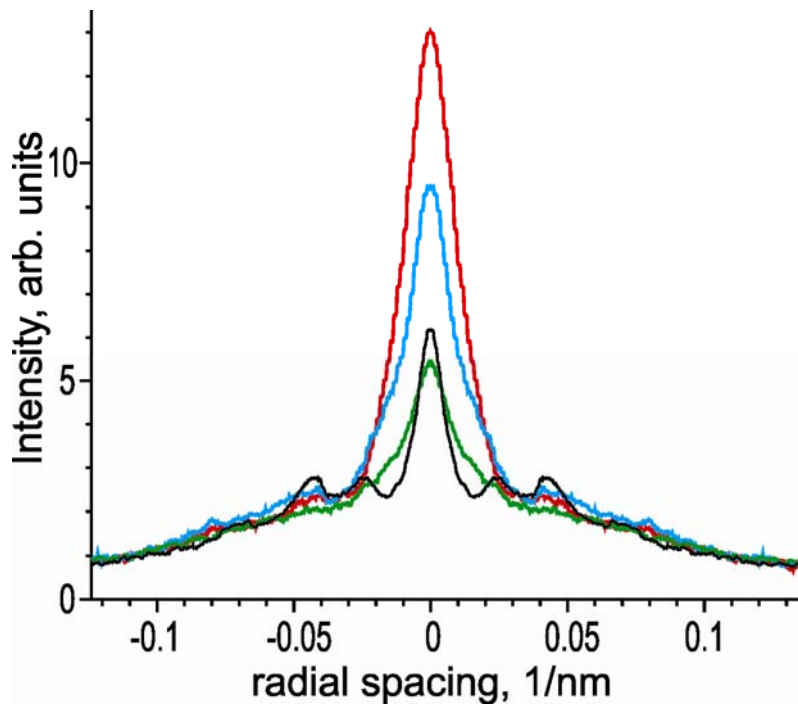

Fig. S1. Radial profiles of the M3 meridional reflection. The M3 profiles for four diffraction patterns shown in Fig. 4 were integrated at meridional spacing from  $0.067 \text{ nm}^{-1}$  to  $0.075 \text{ nm}^{-1}$ . Green, black, blue and red lines correspond to the relaxed and rigor states, and to isometric contraction at the low and high temperature, respectively. No background subtraction was performed.
